# Supplementary material for: Adaptive evolution reveals a tradeoff between growth rate and oxidative stress during naphthoquinone-based aerobic respiration
Source: PubMed Central journal article supplement — Proc Natl Acad Sci U S A. 2019 Nov 25;116(50):25287–92. doi: 10.1073/pnas.1909987116 (PMC6911176; doi:10.1073/pnas.1909987116), 2019-11-25
Supplement: pnas.1909987116.sd01.pdf [file pnas.1909987116.sd01.pdf]

Pyruvate i-modulon genes:

|      |
|------|
| ndh  |
| ackA |
| yjiX |
| aceE |
| aceF |
| ldhA |
| mgo  |
| yhjX |
| yjiY |

Fur-1 i-modulon genes:

|        |
|--------|
| sodB   |
| bfr    |
| yoeG_1 |
| fhuB   |
| fhuD   |
| fecA   |
| yoeA_1 |
| pqqL   |
| ybil   |
| fecI   |
| fepE   |
| yddA   |
| yddB   |
| fepD   |
| fepB   |
| fecR   |
| sufC   |
| sufS   |
| sufB   |
| sufA   |
| sufE   |
| sufD   |
| fepG   |
| ydiE   |
| fepC   |
| entS   |
| yncE   |

|      |
|------|
| nrdH |
| nrdI |
| nrdE |
| yjjZ |
| nrdF |
| entH |
| entC |
| ybdZ |
| entA |
| fhuE |
| entE |
| ybiX |
| entD |
| entB |
| fes  |
| entF |
| fiu  |
| fepA |
| cirA |

RpoS i-modulon genes:

|      |
|------|
| ycgX |
| xisE |
| kdpA |
| kdpB |
| hchA |
| csgF |
| ysgA |
| yccT |
| csgG |
| ldcC |
| ybhB |
| chaB |
| sra  |
| yjiN |
| dkgA |
| yfiL |
| ybeL |
| sodC |

|      |
|------|
| yqjG |
| yniA |
| ydiZ |
| csiE |
| mcbR |
| ycaP |
| yjbJ |
| yddH |
| ybiO |
| ldtE |
| yohF |
| yhjY |
| ydcK |
| yncG |
| rclA |
| osmC |
| yhjG |
| yfdC |
| mlrA |
| tam  |
| curA |
| gmr  |
| yedP |
| yciF |
| ybgS |
| yqjE |
| yhbO |
| osmE |
| yeaQ |
| yehX |
| yliI |
| csiD |
| yehW |
| fic  |
| yqjC |
| aldB |
| yebF |
| psiF |
| yehE |

|      |
|------|
| yqjD |
| ydeI |
| ydaM |
| ybaA |
| gabP |
| lhgO |
| ygaU |
| yqjK |
| yodD |
| yjdN |
| yahK |
| yphA |
| ybhN |
| gabD |
| gabT |
| amyA |
| ytjA |
| fbaB |
| yccJ |
| ybaY |
| yegS |
| treA |
| yhcO |
| ybdK |
| patA |
| ybgA |
| yehY |
| yghA |
| bfr  |
| adhP |
| wrbA |
| yegP |
| ahr  |
| ydhS |
| otsA |
| ecnB |
| yeaH |
| ggt  |
| osmF |

|      |
|------|
| yeaG |
| yebV |
| msyB |
| ymgE |
| tktB |
| talA |
| ycgB |
| elaB |
| clsB |
| yfcG |
| otsB |
| osmY |
| yahO |
| ybhP |
| katE |
| poxB |
| blc  |
| ygaM |
| yiaG |
| ycaC |

SoxS i-modulon genes:

|      |
|------|
| rspA |
| oxyR |
| rspB |
| yaiY |
| ompF |
| lacA |
| hemB |
| pptA |
| acnA |
| lipA |
| lpxC |
| ymgA |
| ygfZ |
| ariR |
| cpsG |
| ribA |
| rimK |

|      |
|------|
| fldB |
| zwf  |
| aegA |
| yjJW |
| yaiA |
| nepI |
| mdlA |
| yhcN |
| mdtG |
| fldA |
| treF |
| nfsA |
| mltC |
| mdlB |
| yobH |
| frvX |
| inaA |
| ybjC |
| yggX |
| poxB |
| yeiI |
| ybaO |
| nfo  |
| yjJI |
| sodA |
| pfo  |
| fpr  |
| fumC |
| nhoA |
| soxS |

OxyR i-modulon genes:

|      |
|------|
| dps  |
| yhjA |
| katG |
| trxC |
| ahpC |
| oxyR |
| ahpF |

|      |
|------|
| grxA |
|------|

EvgA i-modulon genes:

|      |
|------|
| rcnA |
| narG |
| yjiY |
| narZ |
| narW |
| narY |
| narK |
| narU |
| ogrK |
| emrY |
| ypdI |
| emrK |
| yfdE |
| ydeP |
| yegR |
| ydeO |
| yfdV |
| oxc  |
| asr  |
| frc  |
| yfdX |

GadE-W-X i-modulon genes:

|      |
|------|
| gadW |
| ybaT |
| yjjU |
| mdtF |
| glsA |
| dctR |
| aidB |
| mdtE |
| slp  |
| yhiM |
| gadC |
| yhiD |
| hdeA |

|      |
|------|
| hdeD |
| gadB |
| gadA |
| hdeB |
| gadE |

GadWX i-modulon genes:

|      |
|------|
| csgE |
| ybaT |
| gadW |
| mdtF |
| glsA |
| dctR |
| mdtE |
| slp  |
| gadX |

RpoH i-modulon genes:

|      |
|------|
| ycjF |
| hslU |
| hslV |
| fxsA |
| ycjX |
| dnaJ |
| clpB |
| groL |
| htpG |
| groS |
| dnaK |
| ibpA |
| ibpB |

CpxR i-modulon genes:

|      |
|------|
| yagU |
| asr  |
| ybiH |
| ybbA |
| hha  |
| chaA |

|      |
|------|
| cusR |
| yliI |
| ftnB |
| alx  |
| htpX |
| tomB |
| yjfN |
| raiA |
| yccA |
| yobB |
| yebE |
| ldtC |
| dgcZ |
| cpxP |

Nac i-modulon genes:

|      |
|------|
| asnA |
| serA |
| cynR |
| yhjE |
| gltB |
| gltD |
| shiA |
| codA |
| yfbK |
| gspE |
| dppD |
| yieE |
| dppF |
| csiR |
| dppA |
| gspC |
| ompF |
| gabD |
| ybeQ |
| dppB |
| ghxQ |
| gabT |
| codB |

|      |
|------|
| yrhB |
| ygiL |
| gabP |
| feaR |
| cycA |
| abgR |
| guaD |
| nanA |
| patD |
| ydcV |
| ydcU |
| ydcT |
| ydcS |
| yedL |
| nac  |

NtrC & RpoN i-modulon genes:

|      |
|------|
| yeaE |
| rcnA |
| yeaR |
| borD |
| ribB |
| hisJ |
| lhgO |
| hypB |
| potF |
| hisP |
| gltI |
| ygeX |
| gabP |
| prpB |
| asnA |
| mgtA |
| fdhF |
| yeaG |
| asnB |
| asr  |
| mgrB |
| yeaH |

|        |
|--------|
| csiD   |
| chaC   |
| yhdZ   |
| ygeW   |
| patA   |
| glnG   |
| glnL   |
| hypA   |
| ynfM   |
| yhdX   |
| yedL   |
| glnA   |
| yhdY   |
| yqeB   |
| yqeC   |
| zraP   |
| argT   |
| astD   |
| astB   |
| astE   |
| cbl    |
| ddpC   |
| astA   |
| ddpD   |
| ddpF   |
| astC   |
| ddpB   |
| yhdW_2 |
| ddpA   |
| rutG   |
| ddpX   |
| rutF   |
| amtB   |
| rutC   |
| rutE   |
| glnK   |
| rutD   |
| rutB   |
| rutA   |

CecR i-modulon genes:

|      |
|------|
| ybhG |
| ybhF |
| ybhS |
| ybhR |
| ybiH |
